# Supplementary material
Source: Royal Society of Chemistry journal article supplement (doi:10.1039/d6nr01067a)
Supplement: d6nr01067a1.pdf [file d6nr01067a1.pdf]

## Supporting Information

### **Modulating the crystalline assembly of paramagnetic Au<sub>25</sub> nanoclusters by external magnetic field**

Zhipeng Chen,<sup>†</sup> Xinran Xu,<sup>†</sup> Yajie Guan, Nan Xia\*

Key Laboratory of Functional Molecular Solids, Ministry of Education, College of Chemistry and Materials Science, Anhui Normal University, Wuhu 241000, P.R. China

E-mail: xianan@ahnu.edu.cn

## 1. Methods

*Materials.* All chemicals used are commercially available and were used without any additional purification steps. Tetrachloroauric (III) acid ( $\text{HAuCl}_4 \cdot 4\text{H}_2\text{O}$ , 99.7%), tetraoctylammonium bromide (TOAB, 98.0%), 2-phenylethanethiol (PET, 97.0%), sodium borohydride ( $\text{NaBH}_4$ , 98.0%) was purchased from Aladdin. Methanol (99.5%), dichloromethane (AR), petroleum ether (AR), toluene (99.5%), acetonitrile (99.0%), hydrogen peroxide ( $\text{H}_2\text{O}_2$ , 30%) was purchased from Sinopharm chemical reagent co., ltd.

*Synthesis of neutral  $\text{Au}_{25}$  nanoclusters.* The  $\text{Au}_{25}$  anions were first prepared according to the previous literature.<sup>1</sup> Then, 50 mg crystals of  $\text{Au}_{25}$  anions were dissolved in 20 ml dichloromethane and treated with 1 ml  $\text{H}_2\text{O}_2$  (30%). After stirring at room temperature for 1 h, the organic solution was extracted and purified using preparative thin-layer chromatography (dichloromethane/petroleum ether: 1/1) to obtain  $\text{Au}_{25}^0$  nanoclusters.

*Crystal growth and transformation of neutral  $\text{Au}_{25}$  nanoclusters.*  $\text{Au}_{25}^0$  were crystallized in a mixed solvent of 200  $\mu\text{l}$  toluene and 360  $\mu\text{l}$  ethanol for 2~3 days.  $\text{Au}_{25}^0$ -T crystals were obtained by treating  $\text{Au}_{25}^0$  crystals in the mother liquor at 50 °C for 60 h.  $\text{Au}_{25}^0$  crystals can be transformed to  $\text{Au}_{25}^0$ -TM crystals at 50 °C using neodymium magnet. The magnetic intensity was measured by a DLX-STW1045 teslameter.

*Characterization.* Optical absorption spectra were acquired in the range of 190–1000 nm using a Metash UV-6100A spectrophotometer. The single crystal X-ray diffraction data was collected on a Bruker D8 Venture X-ray diffractometer (Bruker, Germany). X-band CW-EPR spectra were collected using a Bruker EMX plus 10/12 X-band EPR spectrometer equipped with an ER4119HS (TE011) high-Q cavity at 2 K. Cryogenic temperatures were achieved using an Oxford Instruments ESR910 liquid helium flow cryostat and an Oxford Instruments ITC503 temperature controller. For the rotating EPR measurement, a piece of dark plate-shaped crystal with dimensions  $\sim 1.0 \times 1.0 \times 0.4$  mm was mounted onto the sample holder using high vacuum grease. The crystal was

embedded in the grease for immobilization during testing. A programmable one-axis goniometer was used for the sample rotation with angle step of  $10^\circ$ .

## 2. Figures and Tables

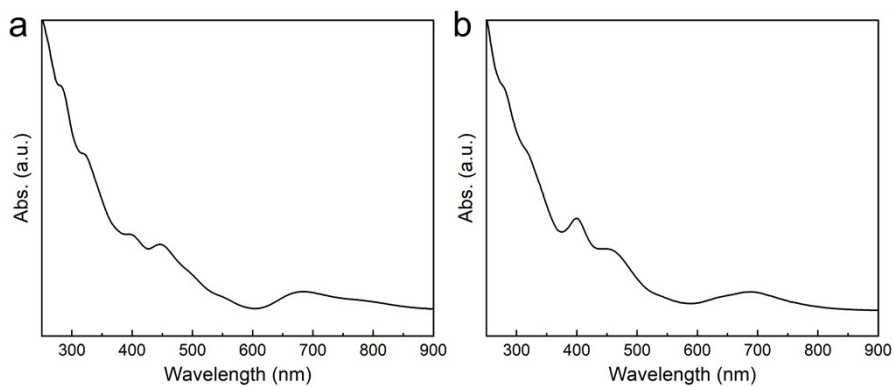

**Figure S1.** Typical UV/vis/NIR spectra of (a)  $\text{Au}_{25}$  anions and (b)  $\text{Au}_{25}^0$ .

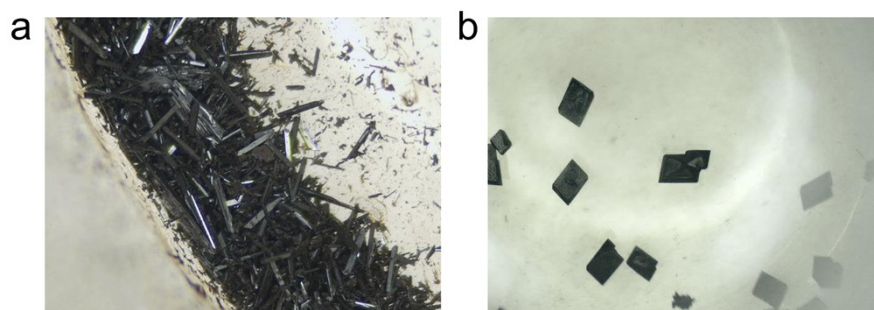

**Figure S2.** Optical microscopy image of (a) needle-like crystals of  $\text{Au}_{25}$  anions and (b) block crystals of  $\text{Au}_{25}^0$ .

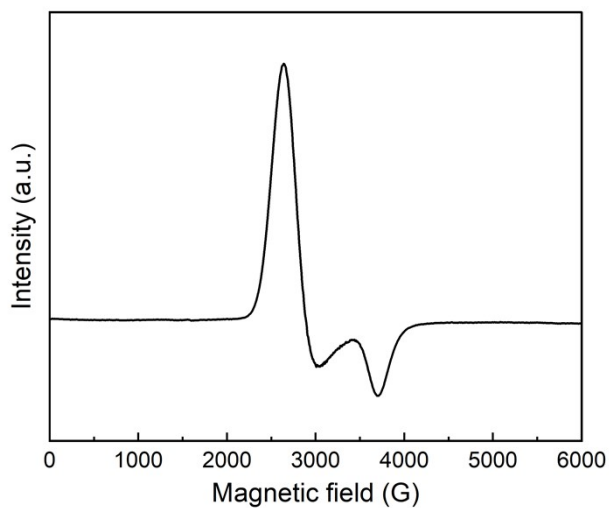

**Figure S3.** Typical EPR signal of  $\text{Au}_{25}^0$  in dichloromethane at 2 K.

**Table S1.** Cell parameters of Au<sub>25</sub><sup>0</sup>-TM crystals under different magnetic intensities.

|                            | 50°C + 60 mT      | 50°C + 120 mT     | 50°C + 180 mT     | 50°C + 280 mT     |
|----------------------------|-------------------|-------------------|-------------------|-------------------|
| Unit<br>cell<br>dimensions | a = 16.13Å        | a = 16.13Å        | a = 16.19Å        | a = 16.17Å        |
|                            | b = 17.75Å        | b = 17.76Å        | b = 17.83Å        | b = 17.78Å        |
|                            | c = 17.95Å        | c = 17.97Å        | c = 18.11Å        | c = 17.97Å        |
|                            | $\alpha$ = 65.01° | $\alpha$ = 65.00° | $\alpha$ = 64.90° | $\alpha$ = 64.94° |
|                            | $\beta$ = 64.54°  | $\beta$ = 64.58°  | $\beta$ = 64.50°  | $\beta$ = 64.56°  |
|                            | $\gamma$ = 81.14° | $\gamma$ = 81.15° | $\gamma$ = 81.12° | $\gamma$ = 81.14° |

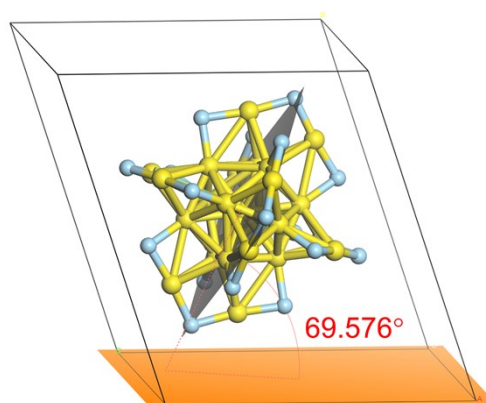

**Figure S4.** The orientation of Au<sub>25</sub><sup>0</sup> NC in the lattice.

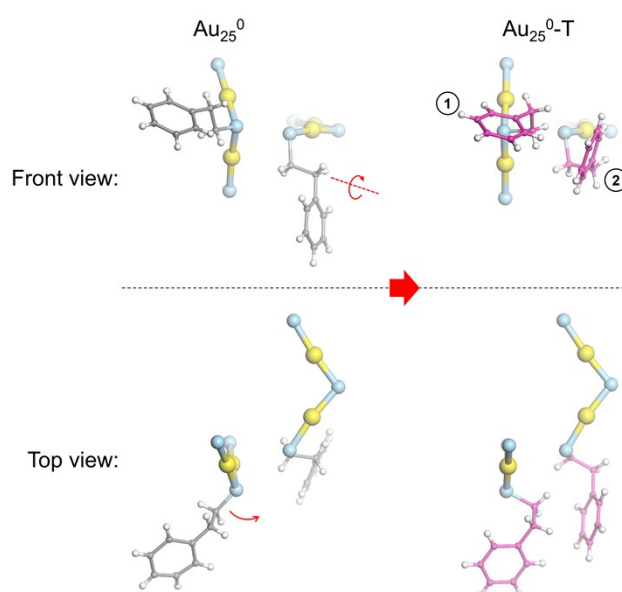

**Figure S5.** Detailed conformational changes of the ligands between Au<sub>25</sub><sup>0</sup> and Au<sub>25</sub><sup>0</sup>-T.

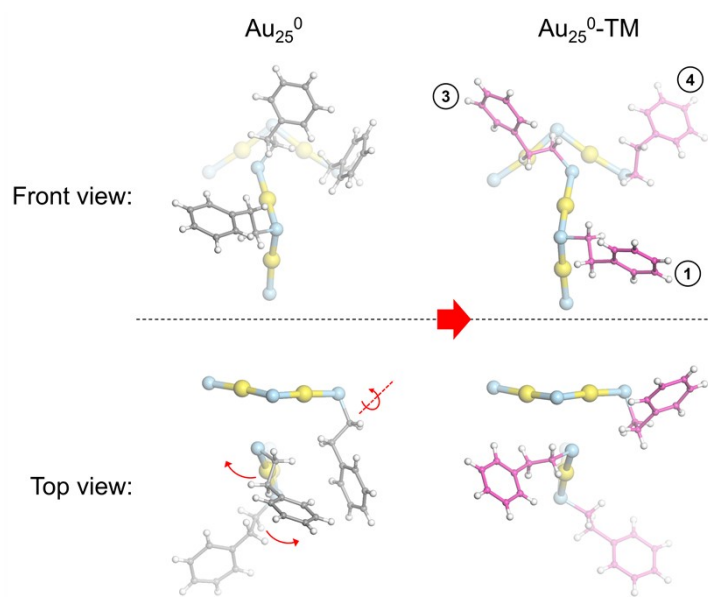

**Figure S6.** Detailed conformational changes of the ligands between  $\text{Au}_{25}^0$  and  $\text{Au}_{25}^0\text{-TM}$ .

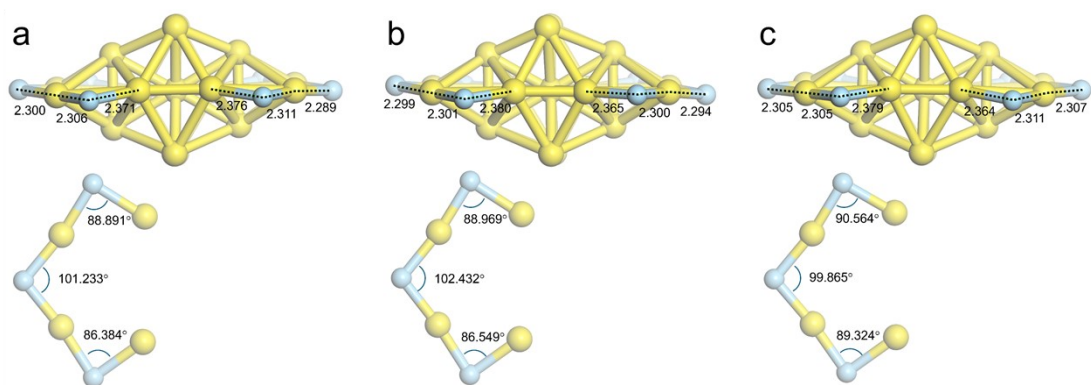

**Figure S7.** Comparison of the Au-S bond (unit of Å) and Au-S-Au angle of the staples in (a)  $\text{Au}_{25}^0$ , (b)  $\text{Au}_{25}^0\text{-T}$ , and (c)  $\text{Au}_{25}^0\text{-TM}$  along x axis.

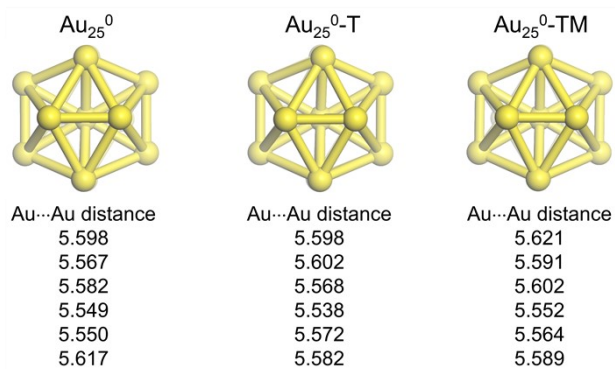

**Figure S8.** Size comparison of the  $\text{Au}_{13}$  kernel in  $\text{Au}_{25}^0$ ,  $\text{Au}_{25}^0\text{-T}$ , and  $\text{Au}_{25}^0\text{-TM}$ .

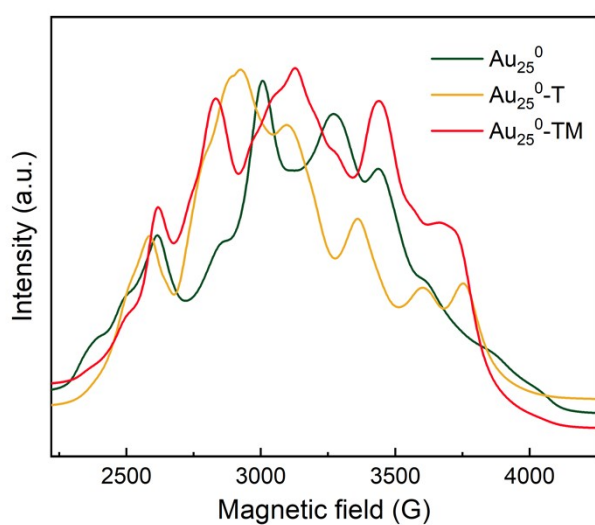

**Figure S9.** The integrated EPR peaks for  $\text{Au}_{25}^0$ ,  $\text{Au}_{25}^0\text{-T}$ , and  $\text{Au}_{25}^0\text{-TM}$  microcrystals.

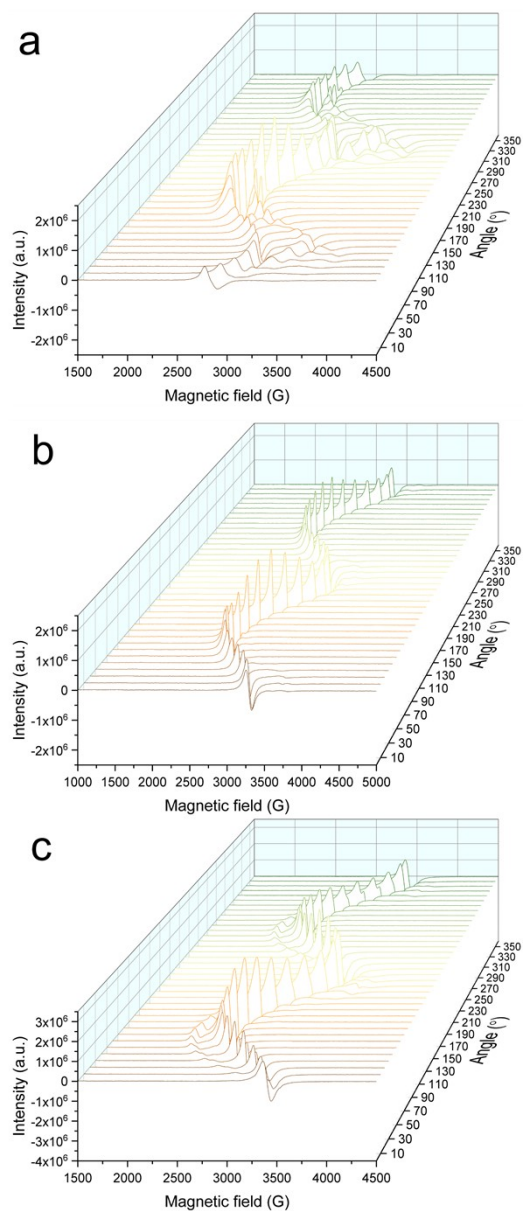

**Figure S10.** Angle-dependent EPR spectra of (a)  $\text{Au}_{25}^0$ , (b)  $\text{Au}_{25}^0\text{-T}$ , and (c)  $\text{Au}_{25}^0\text{-TM}$  single crystals.

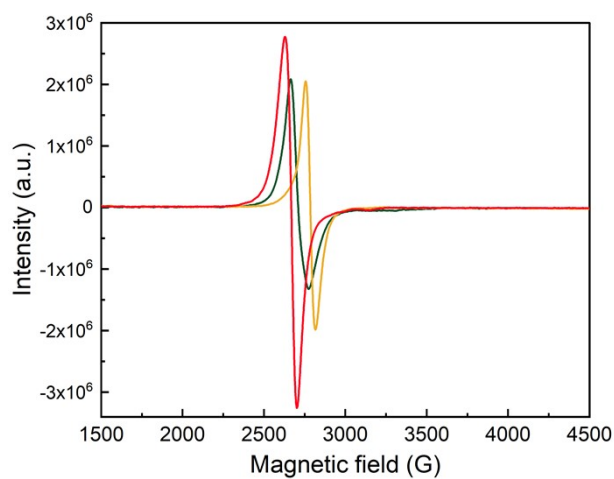

**Figure S11.** The comparison of maximum EPR peaks for  $\text{Au}_{25}^0$ ,  $\text{Au}_{25}^0\text{-T}$ , and  $\text{Au}_{25}^0\text{-TM}$  single crystals.

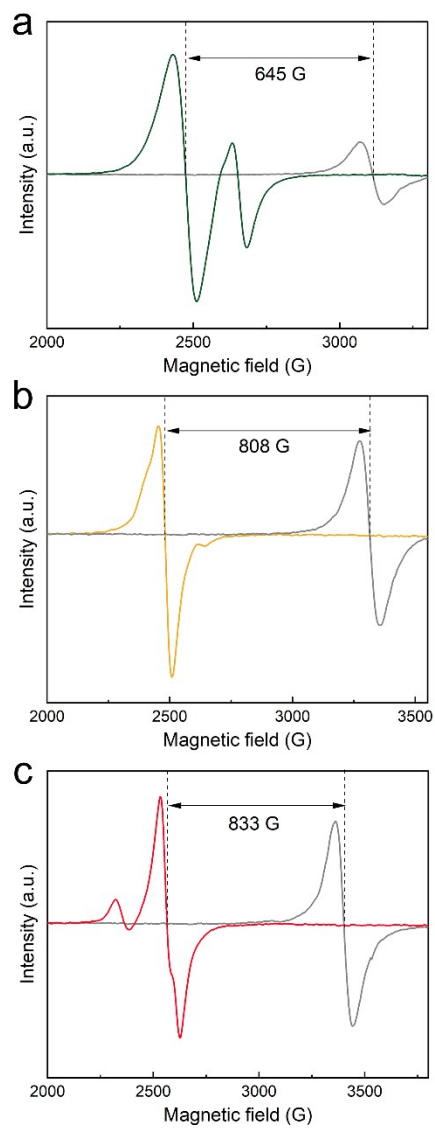

**Figure S12.** The largest  $H_r$  shift of (a)  $\text{Au}_{25}^0$ , (b)  $\text{Au}_{25}^0\text{-T}$ , and (c)  $\text{Au}_{25}^0\text{-TM}$  single crystals during rotational EPR experiments.

**Table S2.** Crystal data and structure refinement for Au<sub>25</sub><sup>0</sup>.

|                                                                   |                                                                                             |
|-------------------------------------------------------------------|---------------------------------------------------------------------------------------------|
| Identification code                                               | mo_20250224_ZhWZ_1_0m                                                                       |
| Empirical formula                                                 | C <sub>144</sub> H <sub>162</sub> Au <sub>25</sub> S <sub>18</sub>                          |
| Formula weight                                                    | 7393.97                                                                                     |
| Temperature/K                                                     | 213.00                                                                                      |
| Crystal system                                                    | monoclinic                                                                                  |
| Space group                                                       | <i>P</i> 2 <sub>1</sub> / <i>c</i>                                                          |
| <i>a</i> /Å                                                       | 17.3927(6)                                                                                  |
| <i>b</i> /Å                                                       | 27.6592(9)                                                                                  |
| <i>c</i> /Å                                                       | 18.4466(7)                                                                                  |
| $\alpha$ /°                                                       | 90                                                                                          |
| $\beta$ /°                                                        | 111.4700(10)                                                                                |
| $\gamma$ /°                                                       | 90                                                                                          |
| Volume /Å <sup>3</sup>                                            | 8258.3(5)                                                                                   |
| <i>Z</i>                                                          | 2                                                                                           |
| $\rho_{\text{calc}}$ g/cm <sup>3</sup>                            | 2.973                                                                                       |
| $\mu$ /mm <sup>-1</sup>                                           | 22.373                                                                                      |
| <i>F</i> (000)                                                    | 6578.0                                                                                      |
| Radiation                                                         | MoK $\alpha$ ( $\lambda$ = 0.71073)                                                         |
| 2 $\theta$ range for data collection /°                           | 4.302 to 54.998                                                                             |
| Index ranges                                                      | -22 $\leq$ <i>h</i> $\leq$ 22, -35 $\leq$ <i>k</i> $\leq$ 35, -23 $\leq$ <i>l</i> $\leq$ 21 |
| Reflections collected                                             | 110450                                                                                      |
| Independent reflections                                           | 18916 [ <i>R</i> <sub>int</sub> = 0.0832, <i>R</i> <sub>sigma</sub> = 0.0592]               |
| Data/restraints/parameters                                        | 18916/821/1088                                                                              |
| Goodness-of-fit on <i>F</i> <sup>2</sup>                          | 1.035                                                                                       |
| Final <i>R</i> indexes [ <i>I</i> $\geq$ 2 $\sigma$ ( <i>I</i> )] | <i>R</i> <sub>1</sub> = 0.0345, <i>wR</i> <sub>2</sub> = 0.0697                             |
| Final <i>R</i> indexes [all data]                                 | <i>R</i> <sub>1</sub> = 0.0531, <i>wR</i> <sub>2</sub> = 0.0767                             |
| Largest diff. peak/hole / eÅ <sup>-3</sup>                        | 2.02/-1.45                                                                                  |

**Table S3.** Crystal data and structure refinement for Au<sub>25</sub><sup>0</sup>-T.

|                                                                   |                                                                                             |
|-------------------------------------------------------------------|---------------------------------------------------------------------------------------------|
| Identification code                                               | cu_250222WQANGZ_AU3_0m                                                                      |
| Empirical formula                                                 | C <sub>144.25</sub> H <sub>162.5</sub> Au <sub>25</sub> Cl <sub>0.5</sub> S <sub>18</sub>   |
| Formula weight                                                    | 7415.20                                                                                     |
| Temperature/K                                                     | 213.00                                                                                      |
| Crystal system                                                    | orthorhombic                                                                                |
| Space group                                                       | <i>P</i> <i>c</i> <i>c</i> <i>n</i>                                                         |
| <i>a</i> /Å                                                       | 27.1121(12)                                                                                 |
| <i>b</i> /Å                                                       | 31.5764(12)                                                                                 |
| <i>c</i> /Å                                                       | 18.6459(8)                                                                                  |
| $\alpha$ /°                                                       | 90                                                                                          |
| $\beta$ /°                                                        | 90                                                                                          |
| $\gamma$ /°                                                       | 90                                                                                          |
| Volume /Å <sup>3</sup>                                            | 15962.8(12)                                                                                 |
| <i>Z</i>                                                          | 4                                                                                           |
| $\rho_{\text{calc}}$ g/cm <sup>3</sup>                            | 3.085                                                                                       |
| $\mu$ /mm <sup>-1</sup>                                           | 44.557                                                                                      |
| <i>F</i> (000)                                                    | 13198.0                                                                                     |
| Radiation                                                         | CuK $\alpha$ ( $\lambda$ = 1.54184)                                                         |
| 2 $\theta$ range for data collection /°                           | 4.296 to 136.71                                                                             |
| Index ranges                                                      | -30 $\leq$ <i>h</i> $\leq$ 32, -38 $\leq$ <i>k</i> $\leq$ 36, -22 $\leq$ <i>l</i> $\leq$ 21 |
| Reflections collected                                             | 136324                                                                                      |
| Independent reflections                                           | 14588 [ <i>R</i> <sub>int</sub> = 0.0825, <i>R</i> <sub>sigma</sub> = 0.0392]               |
| Data/restraints/parameters                                        | 14588/194/901                                                                               |
| Goodness-of-fit on <i>F</i> <sup>2</sup>                          | 1.068                                                                                       |
| Final <i>R</i> indexes [ <i>I</i> $\geq$ 2 $\sigma$ ( <i>I</i> )] | <i>R</i> <sub>1</sub> = 0.0363, <i>wR</i> <sub>2</sub> = 0.0889                             |
| Final <i>R</i> indexes [all data]                                 | <i>R</i> <sub>1</sub> = 0.0415, <i>wR</i> <sub>2</sub> = 0.0917                             |
| Largest diff. peak/hole / eÅ <sup>-3</sup>                        | 2.05/-1.79                                                                                  |

**Table S4.** Crystal data and structure refinement for Au<sub>25</sub><sup>0</sup>-TM.

|                                            |                                                                    |
|--------------------------------------------|--------------------------------------------------------------------|
| Identification code                        | mo_250222WQANGZ_AU4_0m                                             |
| Empirical formula                          | C <sub>158</sub> H <sub>178</sub> Au <sub>25</sub> S <sub>18</sub> |
| Formula weight                             | 7578.24                                                            |
| Temperature/K                              | 213.00                                                             |
| Crystal system                             | triclinic                                                          |
| Space group                                | <i>P</i> -1                                                        |
| a /Å                                       | 16.1923(8)                                                         |
| b /Å                                       | 17.8281(10)                                                        |
| c /Å                                       | 18.1066(10)                                                        |
| α /°                                       | 64.902(2)                                                          |
| β /°                                       | 64.499(2)                                                          |
| γ /°                                       | 81.122(2)                                                          |
| Volume /Å <sup>3</sup>                     | 4269.8(4)                                                          |
| Z                                          | 1                                                                  |
| ρ <sub>calc</sub> g/cm <sup>3</sup>        | 2.947                                                              |
| μ /mm <sup>-1</sup>                        | 21.641                                                             |
| <i>F</i> (000)                             | 3389.0                                                             |
| Radiation                                  | MoKα (λ = 0.71073)                                                 |
| 2θ range for data collection /°            | 4.392 to 52                                                        |
| Index ranges                               | -19 ≤ h ≤ 19, -21 ≤ k ≤ 21, -22 ≤ l ≤ 22                           |
| Reflections collected                      | 82750                                                              |
| Independent reflections                    | 16750 [R <sub>int</sub> = 0.0800, R <sub>sigma</sub> = 0.0614]     |
| Data/restraints/parameters                 | 16750/210/972                                                      |
| Goodness-of-fit on F <sup>2</sup>          | 0.971                                                              |
| Final R indexes [I>=2σ (I)]                | R <sub>1</sub> = 0.0359, wR <sub>2</sub> = 0.0843                  |
| Final R indexes [all data]                 | R <sub>1</sub> = 0.0485, wR <sub>2</sub> = 0.0911                  |
| Largest diff. peak/hole / eÅ <sup>-3</sup> | 1.56/-1.98                                                         |
